# Supplementary material
Source: MDPI journal article supplement (https://www.mdpi.com/2071-1050/15/14/10848)
Supplement: s1 [file s1]

## Supplementary Information

Appendix SA – English translation of the questions used in the survey. The original version used in the survey was in German.

### A1 Please explain your relationship with Eifel National Park.

(tick all that apply)

- ☐ I live inside or near the boundaries of the park permanently.
- ☐ I own a holiday home inside or near the boundaries of the park and stay here regularly.
- ☐ I run a business or work here.
- ☐ Prefer not to say.

### A2 For how long have you lived or regularly visited this area?

---

### A3 Did you know that the Eifel National Park is a protected area?      Yes      No

*If you answered with 'No', perhaps you are interested in the following:*

*"Forest, Water, Wilderness" is the motto of North Rhine-Westphalia's first national park. For the first time, mixed deciduous forests that grow on nutrient-poor soils and are influenced by an Atlantic climate are protected on a large scale. The 110 square kilometre protected area was founded in 2004 and stretches from Monschau-Höfen to Zerkall and from Einruhr to Gemünd.*

....

### A4 Did your personal attitude towards the Eifel National Park change since its foundation in 2004?

|                                                                                                       |                                                                                                       |                                                                                                |
|-------------------------------------------------------------------------------------------------------|-------------------------------------------------------------------------------------------------------|------------------------------------------------------------------------------------------------|
| <input type="radio"/> Yes, my personal attitude towards the Eifel National Park is now more positive. | <input type="radio"/> Yes, my personal attitude towards the Eifel National Park is now more negative. | <input type="radio"/> No, my personal attitude towards the Eifel National Park did not change. |
|-------------------------------------------------------------------------------------------------------|-------------------------------------------------------------------------------------------------------|------------------------------------------------------------------------------------------------|

### A5 How well informed do you feel regarding the Eifel National Park?

|                            |                                   |                                     |                              |
|----------------------------|-----------------------------------|-------------------------------------|------------------------------|
| <input type="radio"/> well | <input type="radio"/> rather well | <input type="radio"/> rather poorly | <input type="radio"/> poorly |
|----------------------------|-----------------------------------|-------------------------------------|------------------------------|

### A6 Which sources of information on the Eifel National Park have you so far used?

(Tick all that apply)

---

|                                                                                                                                                       |                                                          |
|-------------------------------------------------------------------------------------------------------------------------------------------------------|----------------------------------------------------------|
| <input type="radio"/> visit of one of the five gates to the national park (Heimbach, Gemuend, Rurberg, Hoefen, Nideggen) or one of the 15 info points | events organised by other operators (e.g., guided tours) |
| <input type="radio"/> visitor centre and national park centre 'Vogelsang'                                                                             | radio, television                                        |
| <input type="radio"/> brochures by the national park administration                                                                                   | conversation with national park personnel (e.g. ranger)  |
| <input type="radio"/> website of the Eifel National Park (www.nationalpark-eifel.de)                                                                  | friends, people you know                                 |
| <input type="radio"/> National Park Association (brochures, website, events)                                                                          | National park hosts                                      |
| <input type="radio"/> events organised by the national park (e.g., ranger tours, public talks, ranger-guided tours)                                   | social media (Instagram, Facebook etc.)                  |

**A7 Imagine you could now decide on the continuance of the Eifel National Park. Would you...**

- ☐ ... vote for the continuance of the Eifel National Park?
- ☐ ... vote against the continuance of the Eifel National Park?
- ☐ ... abstain?

**A8 Before the Coronavirus epidemic began, which impacts did the National Park have regarding the following issues in the past five years (positively or negatively)?**

|                                                                     | negative              | rather negative       | no impact             | rather positive       | positive              |
|---------------------------------------------------------------------|-----------------------|-----------------------|-----------------------|-----------------------|-----------------------|
| your personal disposable income                                     | <input type="radio"/> |
| your quality of life                                                | <input type="radio"/> |
| your involvement in recreational activities (e.g. walking, cycling) | <input type="radio"/> |
| your feeling of connectedness to nature                             | <input type="radio"/> |
| protecting local traditions                                         | <input type="radio"/> |

|                                                                                        |                       |                       |                       |                       |                       |
|----------------------------------------------------------------------------------------|-----------------------|-----------------------|-----------------------|-----------------------|-----------------------|
| Tourism                                                                                | <input type="radio"/> |
| social relations (e.g. opportunity to meet new people, getting on with the neighbours) | <input type="radio"/> |
| reputation of the region                                                               | <input type="radio"/> |
| job opportunities                                                                      | <input type="radio"/> |
| personal freedom and access                                                            | <input type="radio"/> |
| motorised traffic                                                                      | <input type="radio"/> |
| prices/costs                                                                           | <input type="radio"/> |
| protection of the environment                                                          | <input type="radio"/> |
| other (please specify):                                                                | <input type="radio"/> |

**A9 In your opinion, who benefits the most from the advantages of the Eifel National Park?**

- ☐ the locals
- ☐ the tourists
- ☐ both the locals and the tourists to the same extent
- ☐ the national park does not have any advantages

**A10 In your opinion, who suffers the most from the disadvantages of the Eifel National Park?**

- ☐ the locals
- ☐ the tourists
- ☐ both the locals and the tourists to the same extent
- ☐ the national park does not have any disadvantages

**A11 Do the advantages and disadvantages of the national park affect all locals to the same extent?**

|                            |                           |                                   |
|----------------------------|---------------------------|-----------------------------------|
| <input type="radio"/> Yes. | <input type="radio"/> No. | If 'No', please explain:<br>_____ |
|----------------------------|---------------------------|-----------------------------------|

**A12 Are you personally affected by the existence of the national park?**

|                                            |                                              |                                            |                                                 |
|--------------------------------------------|----------------------------------------------|--------------------------------------------|-------------------------------------------------|
| <input type="radio"/> Yes, through my job. | <input type="radio"/> Yes, in my spare time. | <input type="radio"/> Yes, other:<br>_____ | <input type="radio"/> No, it doesn't affect me. |
|--------------------------------------------|----------------------------------------------|--------------------------------------------|-------------------------------------------------|

[illegible]

**B1 Since March 2020 people's everyday lives have significantly changed because of the lockdown. Which were the negative and positive effects of the lockdown in your opinion?**

(We have given some examples here but feel free to add more in the open choice option at the end.)

|                                           | negative              | rather negative       | neutral               | rather positive       | positive              | not applicable        |
|-------------------------------------------|-----------------------|-----------------------|-----------------------|-----------------------|-----------------------|-----------------------|
| effect on your disposable income          | <input type="radio"/> |
| changed options for shopping              | <input type="radio"/> |
| more visitors in places of natural beauty | <input type="radio"/> |
| walking paths have been busier            | <input type="radio"/> |
| cycling routes have been busier           | <input type="radio"/> |
| working from home                         | <input type="radio"/> |
| fewer meetings with friends or relatives  | <input type="radio"/> |
| more time with family or house mates      | <input type="radio"/> |
| less travel, e.g. by car                  | <input type="radio"/> |
| other effects:                            | <input type="radio"/> |
| other effects:                            | <input type="radio"/> |

**B2 How important has it been for you to live in or near the Eifel National Park?**

|             |                      |                      |           |                |
|-------------|----------------------|----------------------|-----------|----------------|
| Unimportant | Of little importance | Moderately important | Important | Very important |
|-------------|----------------------|----------------------|-----------|----------------|

**B3 Can you please briefly explain your answer to question B2?**

**B4. It is possible that life will not return to being exactly the same as before for a long period of time after the peak of the Coronavirus pandemic has passed and a so-called 'new normal' is established. Which aspects of your personal life you reckon to still be different from life before the Coronavirus pandemic in a year's time?**

**B5 Below are some ideas to manage overcrowding in popular areas or beauty spots such as Wild Kermeter, Lost Wollseifen, the National Park Centre or the National Park Gates during the COVID-19 outbreak. What is your opinion on the following ideas?**

[illegible]

**C1 Have you heard of the following rules for the responsible use of the protected area and how reasonable do you think they are?**

|                                                                        | How reasonable do you think these are? |                        |                          |                            |
|------------------------------------------------------------------------|----------------------------------------|------------------------|--------------------------|----------------------------|
|                                                                        | Very reason-<br>able                   | rather rea-<br>sonable | not very rea-<br>sonable | not at all rea-<br>sonable |
| It's not allowed to veer off the paths                                 | <input type="radio"/>                  | <input type="radio"/>  | <input type="radio"/>    | <input type="radio"/>      |
| It's not allowed to forage for mushrooms or berries or to pick flowers | <input type="radio"/>                  | <input type="radio"/>  | <input type="radio"/>    | <input type="radio"/>      |
| It's not allowed to collect wood from the forest.                      | <input type="radio"/>                  | <input type="radio"/>  | <input type="radio"/>    | <input type="radio"/>      |
| Dogs have to be kept on the leash                                      | <input type="radio"/>                  | <input type="radio"/>  | <input type="radio"/>    | <input type="radio"/>      |
| Smoking and open flames are prohibited                                 | <input type="radio"/>                  | <input type="radio"/>  | <input type="radio"/>    | <input type="radio"/>      |
| Excessive noise has to be avoided in order to not disturb any animals  | <input type="radio"/>                  | <input type="radio"/>  | <input type="radio"/>    | <input type="radio"/>      |

C2 It is important to act in a responsible way in order to protect the environment. How often do you follow the following rules and recommendations when you are within the Eifel National Park:

|                                                                        | <b>always</b>         | <b>most of the time</b> | <b>about half of the time</b> | <b>sometimes</b>      | <b>never</b>          | <b>not applicable</b> |
|------------------------------------------------------------------------|-----------------------|-------------------------|-------------------------------|-----------------------|-----------------------|-----------------------|
| It's not allowed to veer off the paths                                 | <input type="radio"/> | <input type="radio"/>   | <input type="radio"/>         | <input type="radio"/> | <input type="radio"/> | <input type="radio"/> |
| It's not allowed to forage for mushrooms or berries or to pick flowers | <input type="radio"/> | <input type="radio"/>   | <input type="radio"/>         | <input type="radio"/> | <input type="radio"/> | <input type="radio"/> |
| It's not allowed to collect wood from the forest.                      | <input type="radio"/> | <input type="radio"/>   | <input type="radio"/>         | <input type="radio"/> | <input type="radio"/> | <input type="radio"/> |
| Dogs have to be kept on the leash.                                     | <input type="radio"/> | <input type="radio"/>   | <input type="radio"/>         | <input type="radio"/> | <input type="radio"/> | <input type="radio"/> |
| Smoking and open flames are prohibited.                                | <input type="radio"/> | <input type="radio"/>   | <input type="radio"/>         | <input type="radio"/> | <input type="radio"/> | <input type="radio"/> |
| Excessive noise has to be avoided in order to not disturb any animals. | <input type="radio"/> | <input type="radio"/>   | <input type="radio"/>         | <input type="radio"/> | <input type="radio"/> | <input type="radio"/> |

C3 As far as you know do most people (locals and visitors) follow the rules and recommendations of the National Park authority (e.g. keep their dogs on the leash, stay on designated paths)?

- ☐ No one follows the rules.
- ☐ Only some people.
- ☐ Most people.
- ☐ Everyone.
- ☐ Prefer not to say/Don't know.



**C4 How much do you agree/disagree with the following statements:**

|                                                                                      | Strongly disagree.    | Disagree.             | Neutral.              | Agree.                | Strongly agree.       | Prefer not to say.    |
|--------------------------------------------------------------------------------------|-----------------------|-----------------------|-----------------------|-----------------------|-----------------------|-----------------------|
| It is easy for me to use the Eifel National Park responsibly.                        | <input type="radio"/> |
| People important to me expect me to behave in an environmentally responsible manner. | <input type="radio"/> |
| It is important to me that users of the National Park respect the environment.       | <input type="radio"/> |

**D1 We are now going to ask you a few questions about your personal values. How important are the following values to you?**

|                                                                  | Not at all important  | Slightly important    | Moderately important  | Very important        | Extremely important   |
|------------------------------------------------------------------|-----------------------|-----------------------|-----------------------|-----------------------|-----------------------|
| Respecting the environment: living in harmony with other species | <input type="radio"/> |
| Unity with nature: fitting into nature                           | <input type="radio"/> |
| Being helpful: working for the welfare of others                 | <input type="radio"/> |
| Equality: equal opportunities for all                            | <input type="radio"/> |
| Being influential: Having an impact on people and events         | <input type="radio"/> |
| Being wealthy: material possessions, money                       | <input type="radio"/> |

**D2 In your opinion, can most people be trusted or can't you be too careful?**

- ☐ 1- You can't be too careful.
- ☐ 2
- ☐ 3

[illegible]

|                           |                            |                                         |
|---------------------------|----------------------------|-----------------------------------------|
| <input type="radio"/> No. | <input type="radio"/> Yes. | If yes, please list them here:<br>_____ |
|---------------------------|----------------------------|-----------------------------------------|

[illegible]

**E0 In this final section we would like to collect some personal information for statistical purposes. We would like to assure you that all information will be securely stored and will be destroyed at the end of the project. No personal information will be shared.**

**E1 Gender**

- ☐ male
- ☐ female
- ☐ diverse

**E2 Age group**

▼ 18-25 ... prefer not to say

**E3 Which is the highest level of education you have completed?**

- ☐ Volks-/ Hauptschule
- ☐ Mittlere Reife
- ☐ Abitur (university entry qualification)
- ☐ polytechnic degree
- ☐ university degree
- ☐ PhD

**E4 What is your annual household income category?**

- ☐ no income
- ☐ up to 25.000 €
- ☐ 25.000 - 50.000 €
- ☐ 50.000 - 70.000 €
- ☐ more than 70.000 €
- ☐ prefer not to say

**E5 Are you or members of your family working in the tourism industry?**

|                                 |                                                    |                              |     |
|---------------------------------|----------------------------------------------------|------------------------------|-----|
| Yes, for a hotel or restaurant. | Yes, renting out private rooms/holiday apartments. | Yes, other tourist services. | No. |
|---------------------------------|----------------------------------------------------|------------------------------|-----|

**E6 Do you belong to any of these groups? (tick all that apply)**

|                                                                     |                                                                                              |                                                                                               |                                                                                               |
|---------------------------------------------------------------------|----------------------------------------------------------------------------------------------|-----------------------------------------------------------------------------------------------|-----------------------------------------------------------------------------------------------|
| <input type="checkbox"/> dog owner                                  | <input type="checkbox"/> Rambler                                                             | <input type="checkbox"/> angler                                                               | <input type="checkbox"/> equestrian                                                           |
| <input type="checkbox"/> hunter                                     | <input type="checkbox"/> farmer                                                              | <input type="checkbox"/> forest owner                                                         | <input type="checkbox"/> national park host                                                   |
| <input type="checkbox"/> member of the 'Eifel Ramblers Association' | <input type="checkbox"/> member of the 'Eifel National Park Association'                     | <input type="checkbox"/> former civilian employee of the 'Vogelsang' military training ground | <input type="checkbox"/> employee of the national park forestry agency                        |
| <input type="checkbox"/> national park forest guide (volunteer)     | <input type="checkbox"/> active member of the 'churches' network' in the Eifel National Park | <input type="checkbox"/> employee of an Eifel National Park school or nursery                 | <input type="checkbox"/> my child/my children attend an Eifel National Park school or nursery |
| <input type="checkbox"/> none of the above                          |                                                                                              |                                                                                               |                                                                                               |

**E7 IMPORTANT: Which village or town do you live in?**


---

## Appendix SB

Figures S1 to S5: Maps of the spatial distribution of reported perceived impacts in the Eifel National Park. Legend categories refer to average Likert scale scores within the sub-areas shown on the map (1=negative impact, 3=neutral/no impact, 5=positive impact reported). Connectedness refers to 'connectedness to nature'.

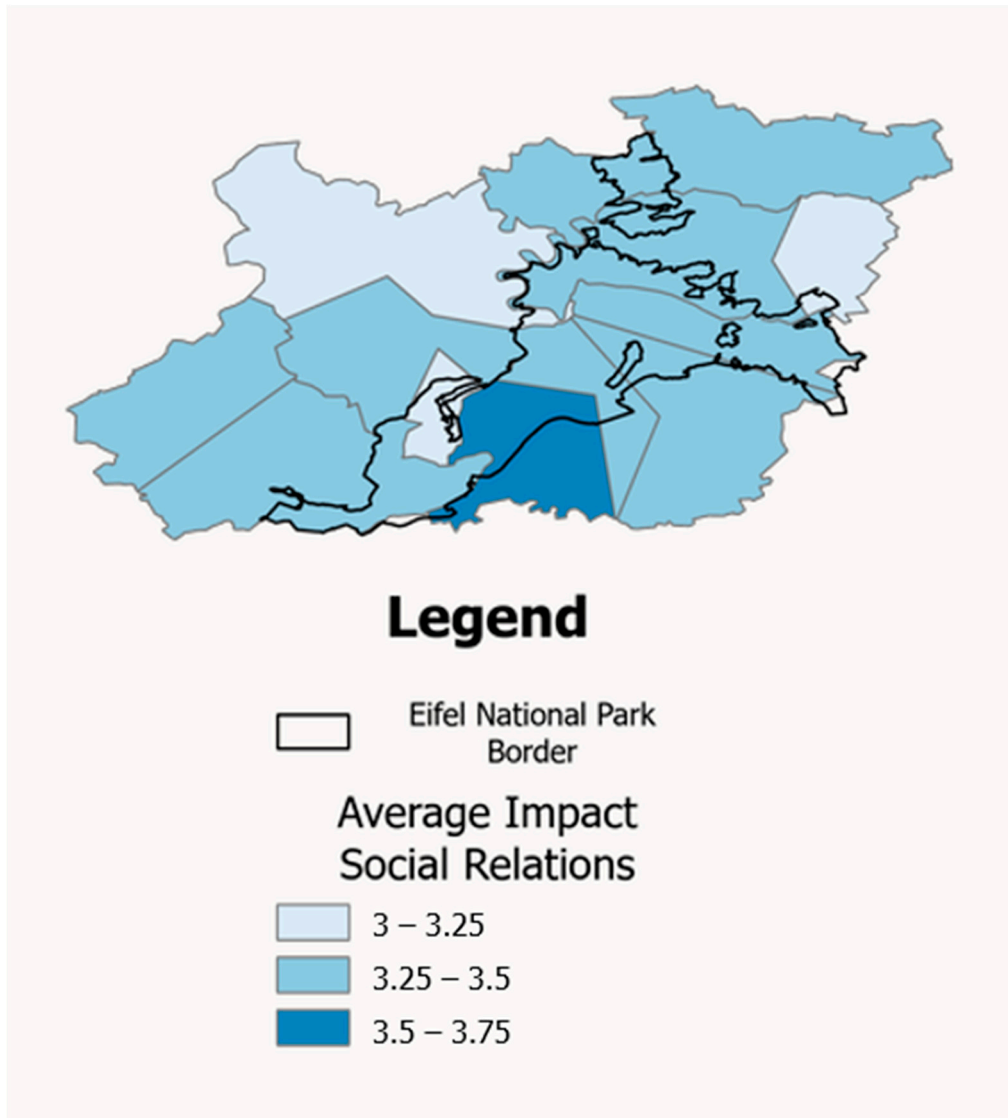

Figure S1 – Map of the spatial distribution of average impacts scores for Social Relations

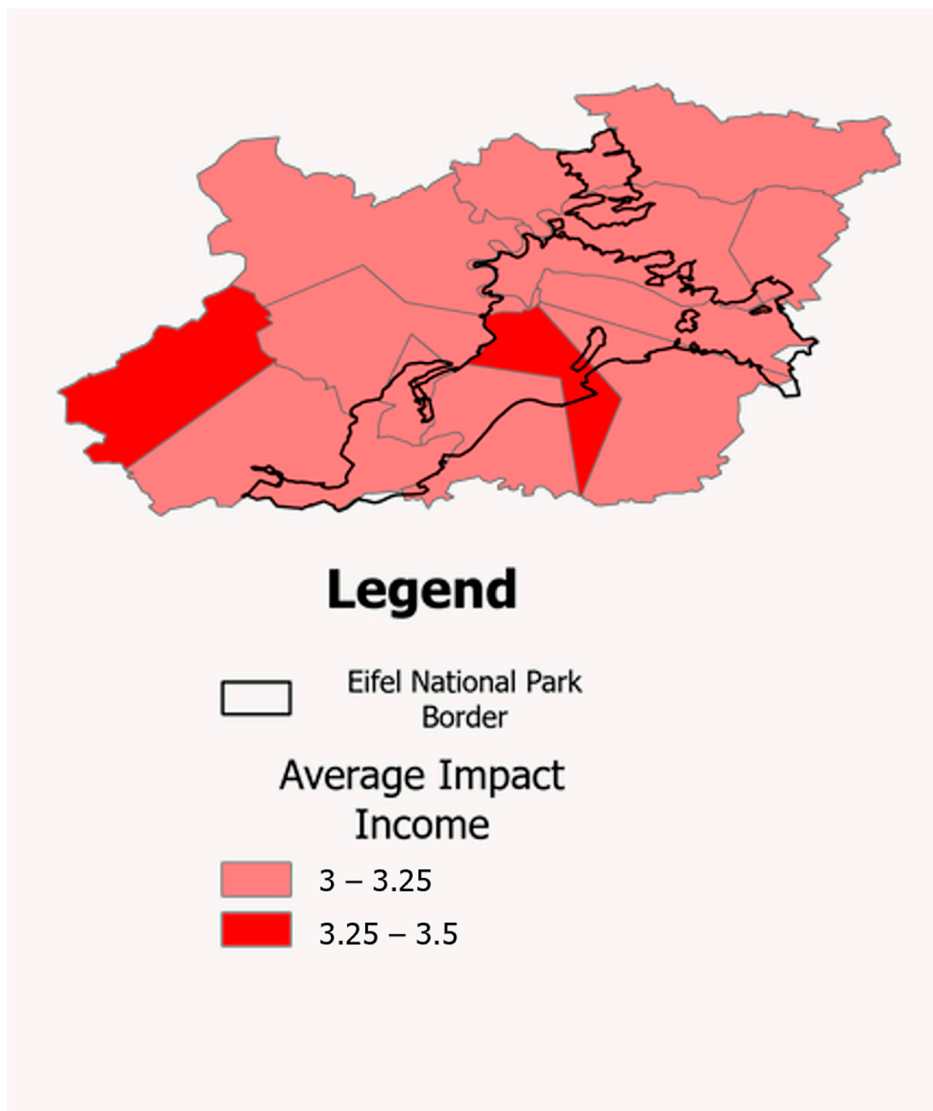

Figure S2 – Map of the spatial distribution of average impacts scores for Income

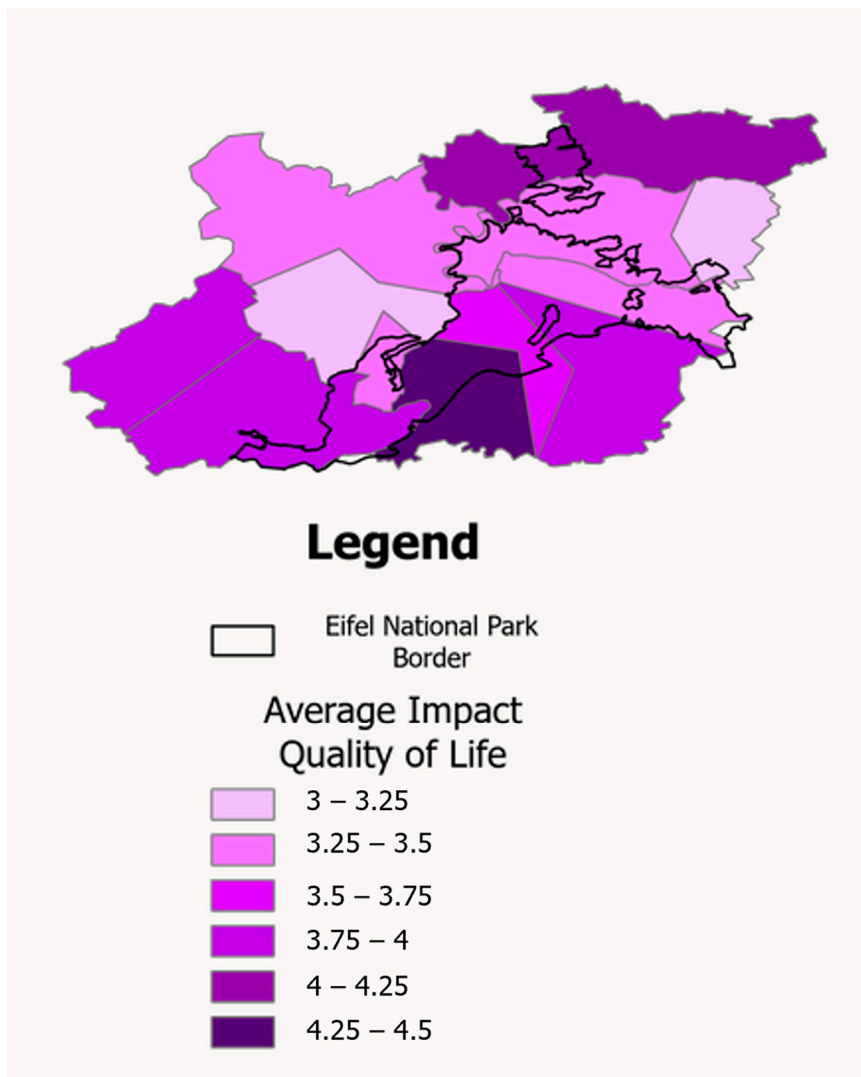

Figure S3 – Map of the spatial distribution of average impacts scores for Quality of Life

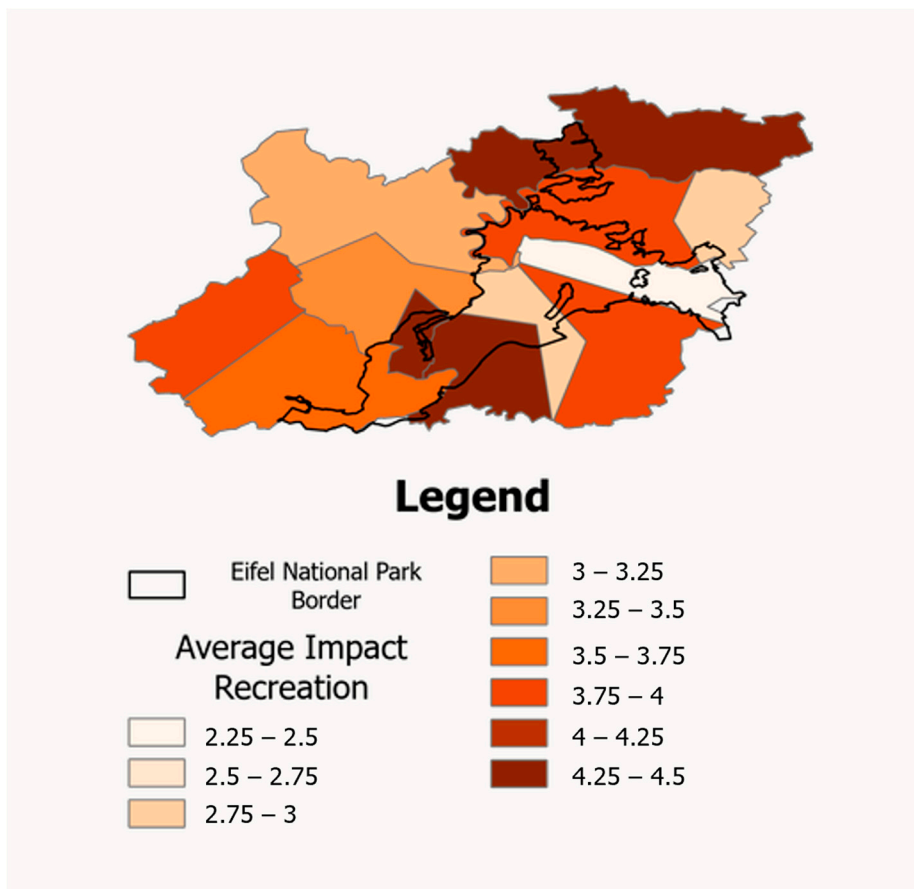

Figure S4 – Map of the spatial distribution of average impacts scores for Recreation



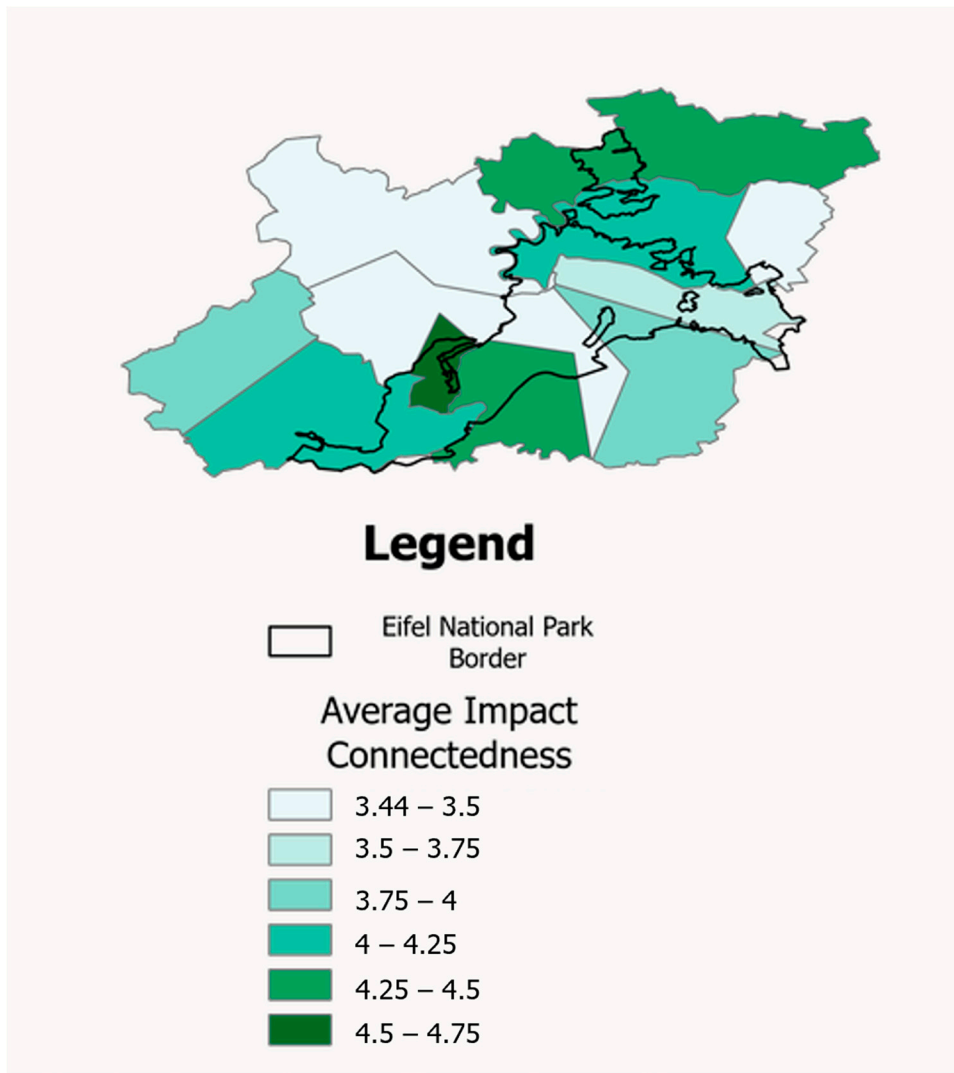

Figure S5 – Map of the spatial distribution of average impacts scores for Connectedness to Nature
